# Supplementary material for: Phosphatidylserine-targeted liposome for enhanced glioma-selective imaging
Source: PubMed Central journal article supplement (PMC5122421; doi:10.18632/oncotarget.9584), 2016-05-25
Supplement: oncotarget-07-38693-s001.pdf [file oncotarget-07-38693-s001.pdf]

## Phosphatidylserine-targeted liposome for enhanced glioma-selective imaging

### SUPPLEMENTARY FIGURE

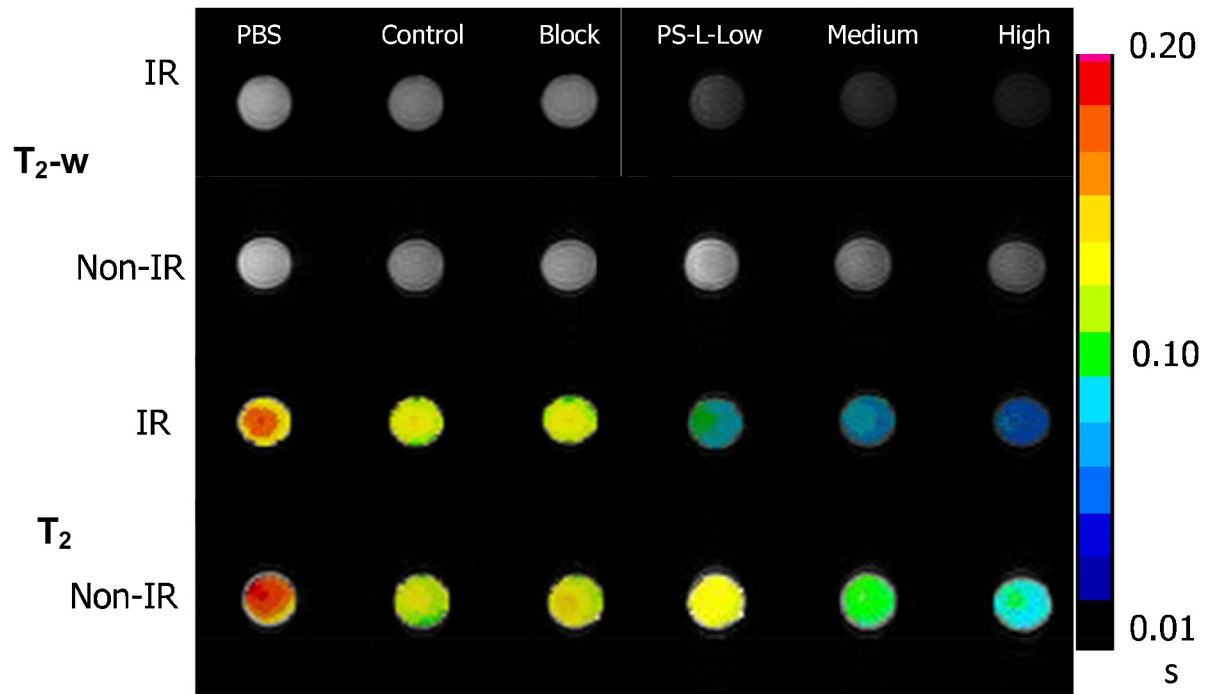

**Supplementary Figure S1: Strong MRI T<sub>2</sub> effect of PS-L-IO/DiR.** Top: T<sub>2</sub>-weighted images clearly showed that the irradiated cells incubated with PS-L-IO/DiR appeared darker (decreased SI) and maximal reduction of SI was observed at the highest iron concentration (High; 52 µg/ml). There was no significant signal change in Aur-L-IO/DiR treated cells (Control) or non-irradiated cells. Specific binding of PS-L-IO/DiR to exposed PS was blocked by pre-treating the cells with unlabeled PGN635 antibodies (Block). Bottom: Corresponding maps of T<sub>2</sub> relaxation time showed significant reduction of T<sub>2</sub> values for the irradiated cells incubated with PS-L-IO/DiR.
